# Supplementary material for: VCAM-1+ placenta chorionic villi-derived mesenchymal stem cells display potent pro-angiogenic activity
Source: PubMed Central journal article supplement (PMC4820943; doi:10.1186/s13287-016-0297-0), 2016-04-04

## **VCAM-1<sup>+</sup> placenta chorionic villi derived Mesenchymal stem cells display potent pro-angiogenic activity**

Wenjing Du, Xue Li, Ying Chi, Fengxia Ma, Zongjin Li, Shaoguang Yang, Baoquan Song, Junjie Cui, Tao Ma, Juanjuan Li, Jianjian Tian, Zhouxin Yang, Xiaoming Feng, Fang Chen, Shihong Lu, Lu Liang, Zhi-bo Han and Zhong-chao Han

### **Supplemental Methods and Results**

#### **Soluble VCAM-1 ELISA assay**

Soluble VCAM-1 (sVCAM-1) concentration in conditioned medium (CM) of VCAM-1<sup>+</sup> and VCAM-1<sup>-</sup>CV-MSCs were measured by using enzyme-linked immunosorbent assay (Neobioscience Biotech). Each sample was performed in triplicates.

#### **Endothelial-like cells differentiation assay *in vitro***

VCAM-1<sup>+</sup> and VCAM-1<sup>-</sup>CV-MSCs were seeded on Matrigel (1:100 dilution, BD) pre-coated flasks and induced endothelial-differentiation in EGM2-MV (Lonza) supplemented with 50ng/ml VEGF (Prepotech) for two weeks. Induction medium was changed twice a week. Cells after induction were collected and assessed by immunostaining of vWF (1:100 dilution, Abcam). The immunostaining procedure as following: cells were fixed with 4% paraformaldehyde (PFA) for 15 minutes, and then permeabilized by 0.25% Triton solution for 15 minutes. After blocking the non-specific

sites with 0.2% bovine serum albumin (BSA) for 30 minutes, cells were immunostained with diluted mouse anti-human vWF for 30 minutes; later cells were washed by PBS and incubated with goat anti-mouse antibodies (1:100 dilution; Invitrogen, Molecular Probes) for another 30minutes. Cells stained with the second antibodies were used as control. Then, Rhodamine phalloidin (1:300 dilution; Life Technologies) was used to stain cells for 30 minutes before DAPI staining. Photos were taken by using Confocal Microscope (Leica).

## Supplemental Tables

**Table S1:** Primers for real time reverse transcription-polymerase chain reaction.

| Primers                    | Sequence                     |
|----------------------------|------------------------------|
| Human GAPDH forward:       | 5'-CGGATTTGGTCGTATTGGGC -3'  |
| Human GAPDH reverse:       | 5'-CTTCCCGTTCTCAGCCTTG -3'   |
| Human VEGF-A forward       | 5'-AGGGCAGAATCATCACGAAGT-3'  |
| Human VEGF-A reverse:      | 5'-AGGGTCTCGATTGGATGGCA-3'   |
| HumanVCAM-1forward:        | 5'-GGGAAGATGGTCGTGATCCTT-3'  |
| HumanVCAM-1 reverse:       | 5'-TCTGGGGTGGTCTCGATTTTA-3'  |
| Human HGF forward:         | 5'-GCTATCGGGGTAAAGACCTACA-3' |
| Human HGF reverse:         | 5'-CGTAGCGTACCTCTGGATTGC-3'  |
| Human bFGF forward:        | 5'-AGTGTGTGCTAACCGTTACCT-3'  |
| Human bFGF reverse:        | 5'-ACTGCCCAGTTCGTTTCAGTG-3'  |
| Human MMP2 forward:        | 5'-GATACCCCTTTGACGGTAAGGA-3' |
| Human MMP2 reverse:        | 5'-CCTTCTCCCAAGGTCCATAGC-3'  |
| Human TGF $\beta$ forward: | 5'-GGCCAGATCCTGTCCAAGC-3'    |
| Human TGF $\beta$ reverse: | 5'-GTGGGTTTCCACCATTAGCAC-3'  |
| Human ANG forward:         | 5'-CAAGGCCATCTGTGAAAACAAG-3' |
| Human ANG reverse:         | 5'-CAGGGGGAACCTCCATGTAG-3'   |
| Human IL-6 forward:        | 5'-CCACACAGACAGCCACTCAC-3'   |
| Human IL-6 reverse:        | 5'-CCAGATTGGAAGCATCCATC-3'   |
| Human IL-8 forward:        | 5'-TTGGCAGCCTTCCTGATTT-3'    |
| Human IL-8 reverse:        | 5'-TCAAAAACCTTCTCCACAACCC-3' |

120 cytokines expression in supernatants of VCAM-1<sup>+</sup> and VCAM-1<sup>-</sup>CV-MSCs were detected. Two donors derived VCAM-1<sup>+/-</sup> CV-MSCs were used. Each sample was performed in duplicates.

Further information: <http://www.raybiotech.com/human-cytokine-array-g1000-4.html>

**Table S2:** The description of the Human cytokine antibody array (AAH-CYT-G1000)

| A       | B      | C      | D      | E       | F       | G      | H      | I         | J         | K      | L       | M      | N      |
|---------|--------|--------|--------|---------|---------|--------|--------|-----------|-----------|--------|---------|--------|--------|
| POS1    | POS2   | POS3   | NEG    | NEG     | ANG     | BDNF   | BLC    | BMP-4     | BMP-6     | Ckβ8-1 | CNTF    | EGF    | CCL11  |
| POS1    | POS2   | POS3   | NEG    | NEG     | ANG     | BDNF   | BLC    | BMP-4     | BMP-6     | Ckβ8-1 | CNTF    | EGF    | CCL11  |
| CCL24   | CCL26  | FGF6   | FGF7   | Flt-3L  | CX3CL1  | GCP-2  | GDNF   | CSF2      | I-309     | IFN-γ  | IGFBP1  | IGFBP2 | IGFBP4 |
| CCL24   | CCL26  | FGF6   | FGF7   | Flt-3L  | CX3CL1  | GCP-2  | GDNF   | CSF2      | I-309     | IFN-γ  | IGFBP1  | IGFBP2 | IGFBP4 |
| IGF-1   | IL-10  | IL-13  | IL-15  | IL-16   | IL-1α   | IL-1β  | IL-1ra | IL-2      | IL-3      | IL-4   | IL-5    | IL-6   | IL-7   |
| IGF-1   | IL-10  | IL-13  | IL-15  | IL-16   | IL-1α   | IL-1β  | IL-1ra | IL-2      | IL-3      | IL-4   | IL-5    | IL-6   | IL-7   |
| Leptin  | LIGHT  | MCP1   | MCP2   | MCP3    | MCP4    | M-CSF  | MDC    | MG        | MIP-16    | MIP-3α | NAP-2   | NT-3   | PARC   |
| Leptin  | LIGHT  | MCP1   | MCP2   | MCP3    | MCP4    | M-CSF  | MDC    | MG        | MIP-16    | MIP-3α | NAP-2   | NT-3   | PARC   |
| PDGF-BB | RANTES | SCF    | SDF-1  | TARC    | TGF-β1  | TGF-β3 | TNF-α  | TNF-β     | NEG       | NEG    | NEG     | NEG    | NEG    |
| PDGF-BB | RANTES | SCF    | SDF-1  | TARC    | TGF-β1  | TGF-β3 | TNF-α  | TNF-β     | NEG       | NEG    | NEG     | NEG    | NEG    |
| POS1    | POS2   | POS3   | NEG    | NEG     | Acrp30  | AgRP   | ANGPT2 | AREG      | Axl       | bFGF   | βNGF    | BTC    | CCL28  |
| POS1    | POS2   | POS3   | NEG    | NEG     | Acrp30  | AgRP   | ANGPT2 | AREG      | Axl       | bFGF   | βNGF    | BTC    | CCL28  |
| CTACK   | Dtk    | EGFR   | ENA-78 | Fas     | FGF4    | FGF9   | CSF3   | GITRL     | GITR      | GRO    | GRO-α   | HCC-4  | HGF    |
| CTACK   | Dtk    | EGFR   | ENA-78 | Fas     | FGF4    | FGF9   | CSF3   | GITRL     | GITR      | GRO    | GRO-α   | HCC-4  | HGF    |
| ICAM1   | ICAM3  | IGFBP3 | IGFBP6 | sIGF-1R | IL1R4   | IL-1R1 | IL-11  | IL-12 p40 | IL-12 p70 | IL-17  | IL-2 Rα | sIL-6R | IL-8   |
| ICAM1   | ICAM3  | IGFBP3 | IGFBP6 | sIGF-1R | IL1R4   | IL-1R1 | IL-11  | IL-12 p40 | IL-12 p70 | IL-17  | IL-2 Rα | sIL-6R | IL-8   |
| I-TAC   | XCL1   | MIF    | MIP-1α | MIP-1β  | MIP-3β  | MSP-α  | NT-4   | OPG       | OSM       | PLGF   | sgp130  | sTNFR2 | sTNFR1 |
| I-TAC   | XCL1   | MIF    | MIP-1α | MIP-1β  | MIP-3β  | MSP-α  | NT-4   | OPG       | OSM       | PLGF   | sgp130  | sTNFR2 | sTNFR1 |
| TECK    | TIMP1  | TIMP2  | THPO   | TRAILR3 | TRAILR4 | μPAR   | VEGF-A | VEGF-D    | NEG       | NEG    | NEG     | NEG    | NEG    |
| TECK    | TIMP1  | TIMP2  | THPO   | TRAILR3 | TRAILR4 | μPAR   | VEGF-A | VEGF-D    | NEG       | NEG    | NEG     | NEG    | NEG    |

The markers of CV-MSCs derived from three healthy donors were evaluated by LSRII flow cytometer (BD). Data was analyzed by Flowjo7.6 software.

**Table S3:** Phenotype of three donors derived CV-MSC.

| Markers (%)  | CV-MSC Donor 1 | CV-MSC Donor 2 | CV-MSC Donor 3 | Mean±SEM    |
|--------------|----------------|----------------|----------------|-------------|
| CD14         | 4.43           | 0.05           | 5.53           | 3.33±1.6    |
| CD29         | 99.82          | 99.85          | 99.40          | 99.69±0.14  |
| CD31         | 0.02           | 0.24           | 0.93           | 0.39±0.27   |
| CD45         | 0.45           | 0.79           | 2.24           | 1.16±0.54   |
| CD54         | 65.24          | 84.07          | 93.30          | 80.87±8.25  |
| CD73         | 99.14          | 99.32          | 99.20          | 99.22±0.05  |
| CD90         | 99.86          | 99.85          | 94.10          | 97.94±1.91  |
| CD105        | 99.90          | 99.04          | 95.70          | 98.21±1.28  |
| VCAM-1/CD106 | 73.02          | 54.77          | 60.90          | 62.9±5.36   |
| CD144        | 0.21           | 0.05           | 5.47           | 1.91±1.78   |
| CD133        | 0.21           | 0.06           | 0.08           | 0.11±0.04   |
| CD166        | 48.40          | 72.55          | 94.20          | 71.72±13.23 |
| HLA-ABC      | 91.10          | 98.24          | 93.61          | 94.32±2.09  |
| HLA-DR       | 0.12           | 3.09           | 0.64           | 1.28±0.91   |

Cytokine profiles of VCAM-1<sup>+</sup> and VCAM-1<sup>-</sup> CV-MSCs revealed 15 factors angiogenic cytokines to be significantly different. Among them, 13 cytokines showed an increased expression in VCAM-1<sup>+</sup> CV-MSC in comparison with VCAM-1<sup>-</sup> CV-MSC.

**Table S4:** Differential angiogenesis cytokines of VCAM-1<sup>-</sup> and VCAM-1<sup>+</sup> CV-MSC.

| Angiogenic Cytokines | VCAM-1 <sup>-</sup> CV-MSC<br>Mean | VCAM-1 <sup>+</sup> CV-MSC<br>Mean | Ratio |
|----------------------|------------------------------------|------------------------------------|-------|
| Angiogenin           | 2482                               | 3308                               | 1.333 |
| GM-CSF/CSF2          | 1348                               | 7721                               | 5.729 |
| IL-1 $\alpha$        | 506                                | 814                                | 1.609 |
| IL-1 $\beta$ 45      | 155                                | 1021                               | 6.572 |
| MCP-3/CCL7           | 6238                               | 8224                               | 1.318 |
| RANTES/CCL5          | 986                                | 675                                | 0.685 |
| TARC                 | 310                                | 230                                | 0.743 |
| Angiopoietin-2       | 219                                | 296                                | 1.353 |
| CTACK/CCL27          | 161                                | 211                                | 1.308 |
| GCSF/CSF3            | 571                                | 1161                               | 2.036 |
| GRO-alpha/CXCL1      | 399                                | 593                                | 1.487 |
| HGF                  | 11110                              | 14751                              | 1.328 |
| IL-8                 | 610                                | 1041                               | 1.706 |
| Osteoprotegerin/OPG  | 13636                              | 19917                              | 1.461 |
| uPAR                 | 282                                | 477                                | 1.691 |

**Supplemental Fig.1:** sVCAM-1 concentration in 48hours CM of VCAM-1<sup>+</sup> and VCAM-1<sup>-</sup>CV-MSCs were measured by ELISA. Both of them secreted very fewer sVCAM-1 in normal conditions (<20pg/ml). Additionally, there is no statistically difference between VCAM-1<sup>+</sup> and VCAM-1<sup>-</sup> CV-MSCs in sVCAM-1 secretion (p>0.05).

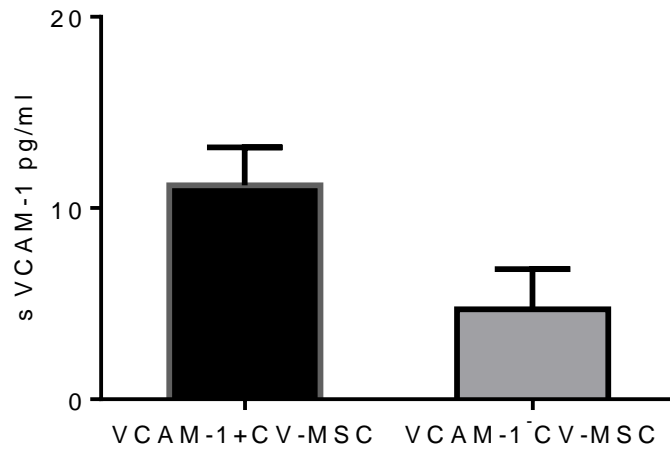

**Supplemental Fig.2:** The endothelial-like cells derived from VCAM-1<sup>+</sup> and VCAM-1<sup>-</sup> CV-MSCs were harvested after *in vitro* endothelial-induction and immunostained by anti-vWF antibodies to evaluate their endothelial-differentiation capacities. Photos were captured by using Confocal Microscope (Leica, scale bar=40μm). Cells labeled with the second antibodies were used as control. Endothelial-like cells induced from VCAM-1<sup>+</sup> (b) and VCAM-1<sup>-</sup>CV-MSCs (c) were stained with anti-vWF antibodies, respectively. No apparent differences were seen between VCAM-1<sup>+</sup> and VCAM-1<sup>-</sup> CV-MSCs.

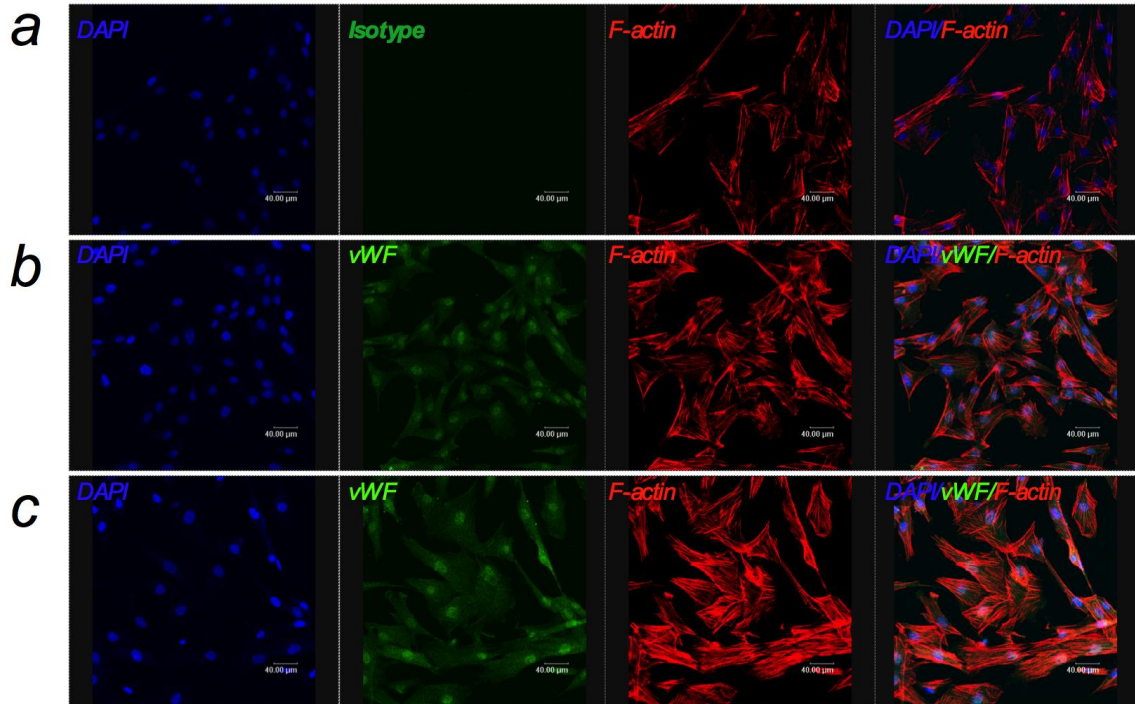

Supplement: 13287_2016_297_MOESM1_ESM.pdf [file 13287_2016_297_MOESM1_ESM.pdf]
